# Supplementary material for: Integrated design of a Ni thin-film electrode on a porous alumina template for affordable and high-performance low-temperature solid oxide fuel cells
Source: Royal Society of Chemistry journal article supplement (doi:10.1039/c7ra02719b), 2017-01-01
Supplement: c7ra02719b1.pdf [file c7ra02719b1.pdf]

Electronic Supplementary Information (ESI)

**Integrated design of a Ni thin-film electrode on a porous alumina template for affordable and high-performance low-temperature solid oxide fuel cells**

Sanghoon Ji<sup>a,b,c,†</sup>, Han Gil Seo<sup>a,†</sup>, Siwon Lee<sup>a</sup>, Jongsu Seo<sup>a</sup>, Yeageun Lee<sup>d</sup>, Waqas Hassan Tanveer<sup>d</sup>, Suk Won Cha<sup>d</sup>, and WooChul Jung<sup>a,\*</sup>

---

<sup>a</sup>Department of Materials Science and Engineering, Korea Advanced Institute of Science and Technology, Daehak-ro, Yuseong-gu, Daejeon 34141, Republic of Korea. Fax: +82-42-350-3310; Tel: +82-42-350-3314. E-mail: wcjung@kaist.ac.kr

<sup>b</sup>Applied Science Research Center, Korea Advanced Institute of Science and Technology, Daehak-ro, Yuseong-gu, Daejeon 34141, Republic of Korea.

<sup>c</sup>Future Strategy & Convergence Research Institute, Korea Institute of Civil Engineering and Building Technology, Goyangdae-ro, Ilsanseo-gu, Goyang-si, Gyeonggi-do 10223, Republic of Korea.

<sup>d</sup>Department of Mechanical and Aerospace Engineering, Seoul National University, Gwanak-ro, Gwanak-gu, Seoul 08826, Republic of Korea.

† These two authors made equal contributions.

\*E-mail: wcjung@kaist.ac.kr

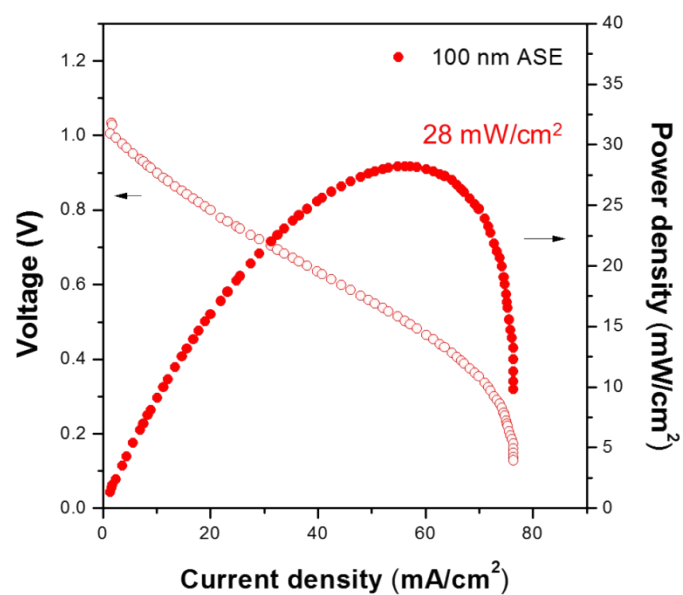

**Fig. S1.** Current-voltage ( $I$ - $V$ ) characteristics of a full cell with a 100 nm-thick Ni ASE measured at 500°C

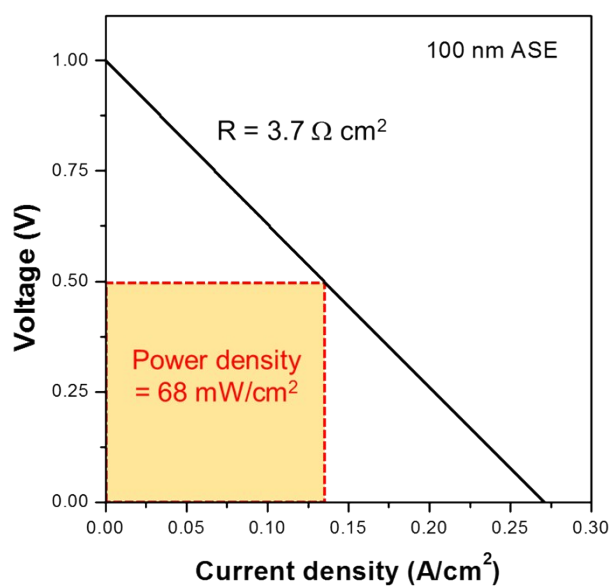

**Fig. S2.** Estimated power density of a full cell with a 100 nm-thick Ni ASE based on the ASR values of only the anode. Linear  $I$ - $V$  characteristics are assumed.

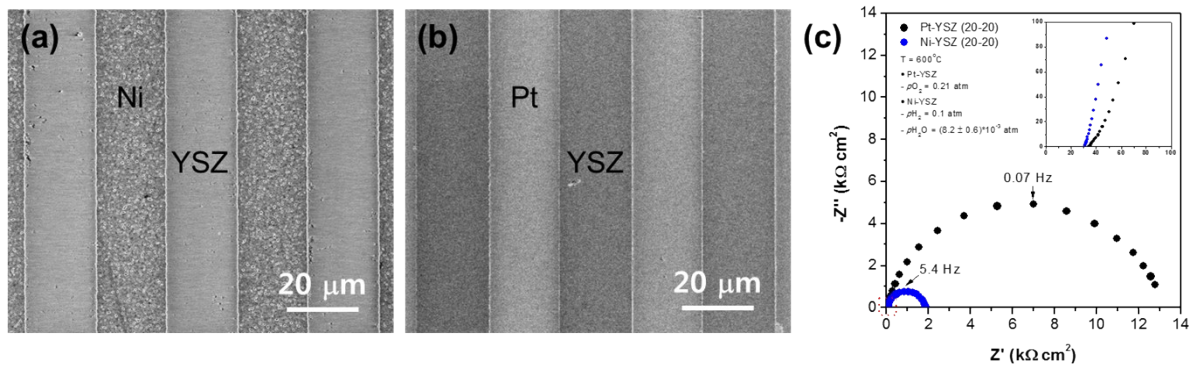

**Fig. S3.** Top-view SEM images of well-defined, 20  $\mu\text{m}$  (a) Ni and (b) Pt patterns on a YSZ substrate. (c) The impedance spectra of both symmetric cells (Ni|YSZ|Ni and Pt|YSZ|Pt) measured at 600°C with anodic ( $p_{\text{H}_2} = 0.1 \text{ atm}$ ,  $p_{\text{H}_2\text{O}} = (8.2 \pm 0.6) \times 10^{-3} \text{ atm}$ ) and cathodic ( $p_{\text{O}_2} = 0.21 \text{ atm}$ ) conditions.

**Table S1.** The electrolyte-area normalized electrode resistances and capacitances of both symmetric cells (Ni|YSZ|Ni and Pt|YSZ|Pt) measured at 600°C with anodic ( $p_{\text{H}_2} = 0.1 \text{ atm}$ ,  $p_{\text{H}_2\text{O}} = (8.2 \pm 0.6) \times 10^{-3} \text{ atm}$ ) and cathodic ( $p_{\text{O}_2} = 0.21 \text{ atm}$ ) conditions.

| 600°C                             | Ni-YSZ             | Pt-YSZ             |
|-----------------------------------|--------------------|--------------------|
| ASR ( $\Omega\text{cm}^2$ )       | 902                | 6537               |
| Capacitance ( $\text{Fcm}^{-2}$ ) | $4 \times 10^{-5}$ | $3 \times 10^{-4}$ |
